# Supplementary material for: Alumina anchored CQDs/TiO2 nanorods by atomic layer deposition for efficient photoelectrochemical water splitting under solar light
Source: Royal Society of Chemistry journal article supplement (doi:10.1039/c8ta05092a), 2018-01-01
Supplement: c8ta05092a1.pdf [file c8ta05092a1.pdf]

## Electronic Supplementary Information (ESI)

### **Alumina anchored CQDs/TiO<sub>2</sub> nanorods by atomic layer deposition for efficient photoelectrochemical water splitting under solar light**

*Min Feng,<sup>a,b</sup> Ying Liu,<sup>a,\*</sup> Ning Wei,<sup>a</sup> Shaochen Ma,<sup>a</sup> Zhaoxia Li,<sup>b</sup>  
Hongguang Li,<sup>b,\*</sup> Shougang Chen,<sup>a</sup> Jian Liu,<sup>b,c</sup> Daoai Wang<sup>b,c,\*</sup>*

<sup>a</sup> Institute of Materials Science and Engineering, Ocean University of China, Qingdao  
266100, China

<sup>b</sup> State Key Laboratory of Solid Lubrication, Lanzhou Institute of Chemical Physics,  
Chinese Academy of Sciences, Lanzhou 730000, China

<sup>c</sup> Qingdao Center of Resource Chemistry and New Materials, Qingdao 266100, China

\*Corresponding Author. E-mail: liuyingwda@ouc.edu.cn; wangda@licp.cas.cn

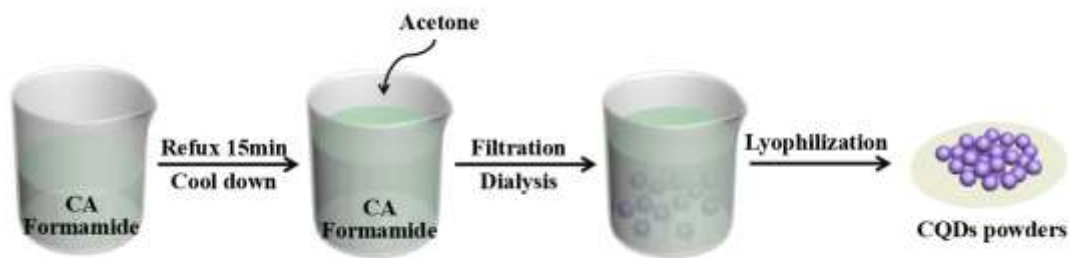

**Fig. S1** The schematic diagram of the preparation process of carbon quantum dots (CQDs).

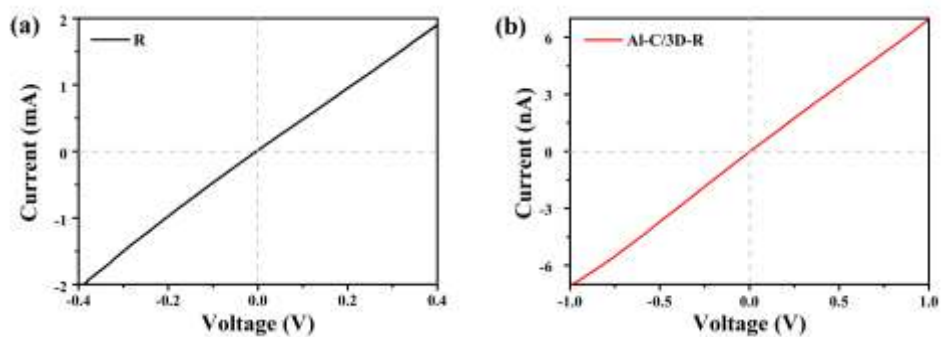

**Fig. S2** *I-V* characteristics between FTO substrate and (a)  $\text{TiO}_2$  NRs (R) and (b)  $\text{Al}_2\text{O}_3$ -CQDs/3D- $\text{TiO}_2$  NRs (Al-C/3D-R).

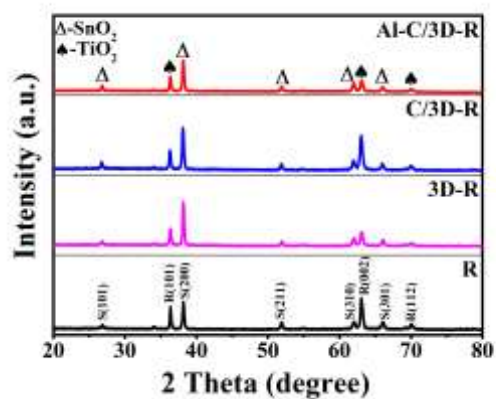

**Fig. S3** XRD patterns of Rutile  $\text{TiO}_2$  NRs (R); 3D- $\text{TiO}_2$  NRs (3D-R); CQDs/3D- $\text{TiO}_2$  NRs (C/3D-R) and CQDs/3D- $\text{TiO}_2$  NRs with 5 nm  $\text{Al}_2\text{O}_3$  layer (Al-C/3D-R).

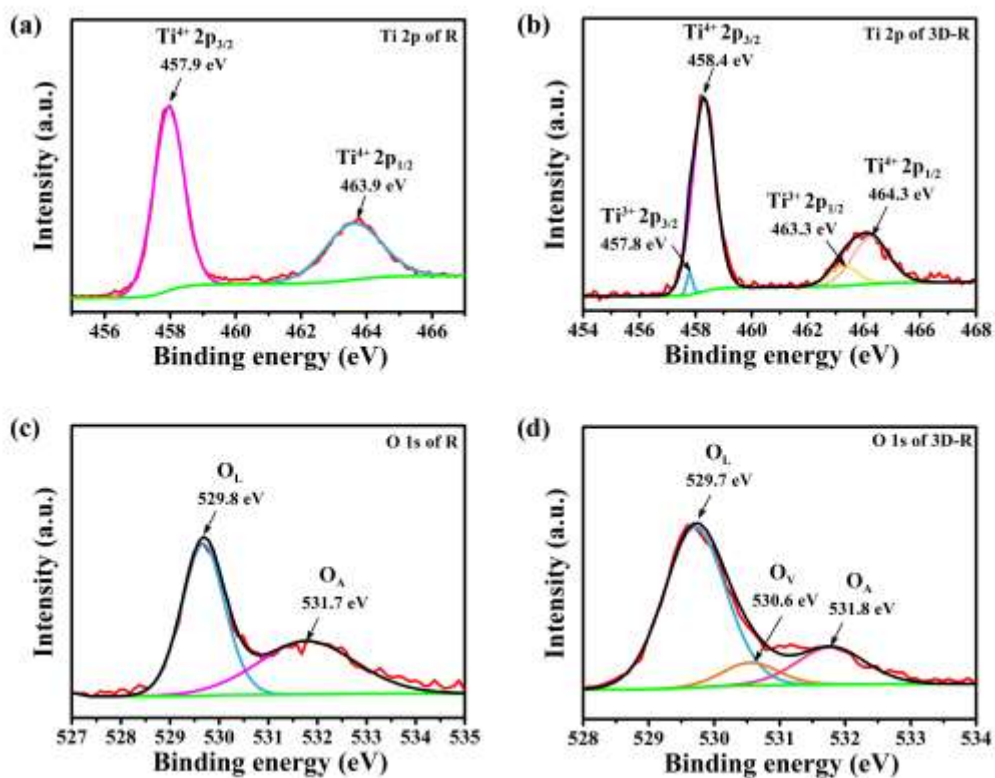

**Fig. S4** High resolution XPS spectra of Ti 2p (a, b) and O 1s (c, d) of TiO<sub>2</sub> NRs (R) and 3D-TiO<sub>2</sub> NRs (3D-R).

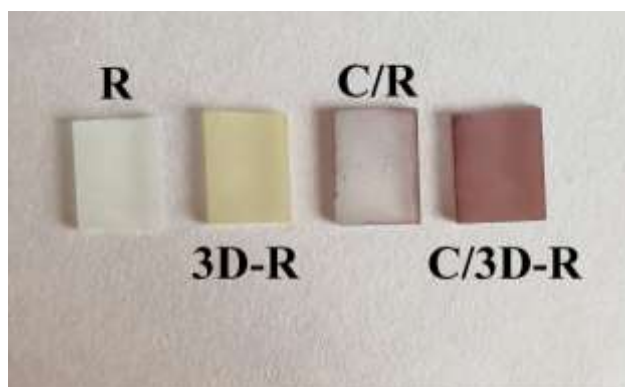

**Fig. S5** Pictures of TiO<sub>2</sub> NRs (R), 3D-TiO<sub>2</sub> NRs (3D-R), CQDs/TiO<sub>2</sub> NRs (C/R) and CQDs/3D-TiO<sub>2</sub> NRs (C/3D-R) from left to right.

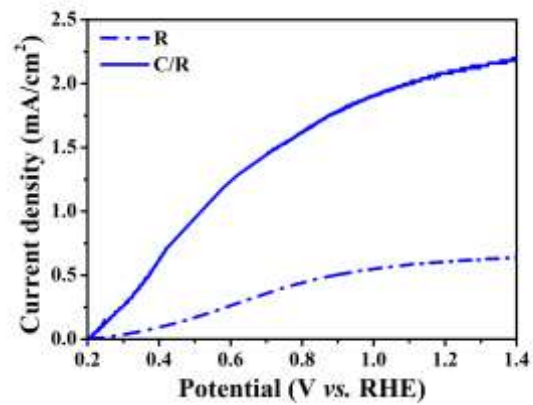

**Fig. S6** *J-V* curves of TiO<sub>2</sub> NRs (R) and CQDs/TiO<sub>2</sub> NRs (C/R).

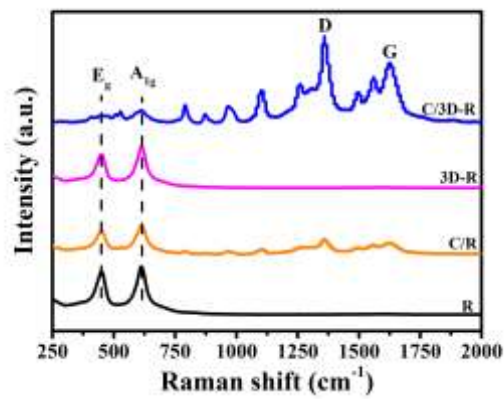

**Fig. S7** Raman spectra of TiO<sub>2</sub> NRs (R), 3D-TiO<sub>2</sub> NRs (3D-R), CQDs/TiO<sub>2</sub> NRs (C/R) and CQDs/3D-TiO<sub>2</sub> NRs (C/3D-R).

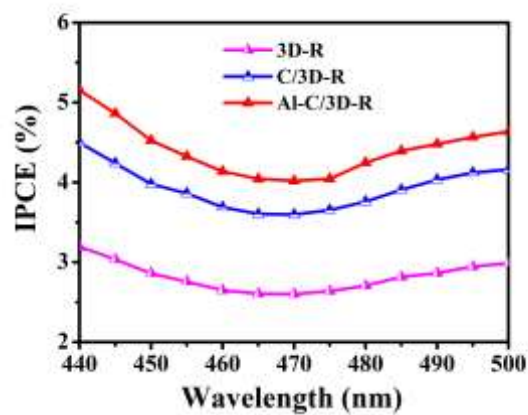

**Fig. S8** IPCE spectra (from 440 nm to 500 nm) of 3D-TiO<sub>2</sub> NRs (3D-R); CQDs/3D-TiO<sub>2</sub> NRs (C/3D-R) and CQDs/3D-TiO<sub>2</sub> NRs with 5 nm Al<sub>2</sub>O<sub>3</sub> layer (Al-C/3D-R).

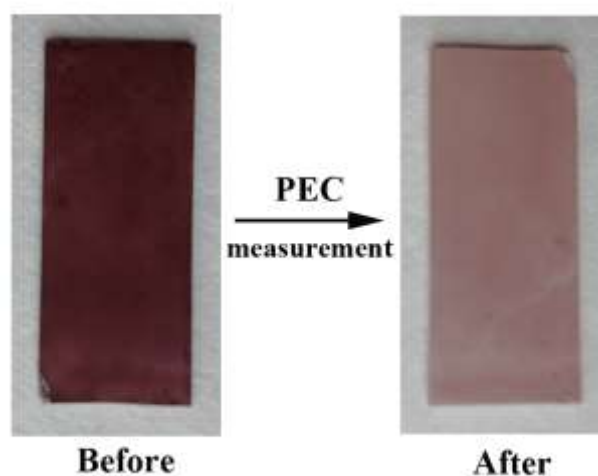

**Fig. S9** The color change of CQDs/3D-TiO<sub>2</sub> NRs nanocomposites before and after PEC measurements.

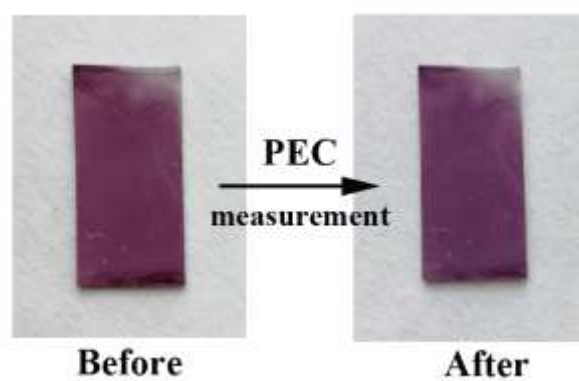

**Fig. S10** The color change of Al<sub>2</sub>O<sub>3</sub>-CQDs/3D-TiO<sub>2</sub> NRs nanocomposites before and after PEC measurements.

| C [%] | O [%] | N [%] | H [%] |
|-------|-------|-------|-------|
| 45.34 | 34.28 | 16.72 | 3.66  |

**Table S1** Element analysis of CQDs.
